# Supplementary material for: Narjatamanins A and B, a pair of novel epimers possessing a 2,3-seco-iridoid skeleton with an unusual 1,10-oxygen bridge from Nardostachys jatamansi and evaluation of their effects on worm paralysis in AD C. elegans
Source: Royal Society of Chemistry journal article supplement (doi:10.1039/c9ra04485j), 2019-01-01

## Supporting Information (SI)

### **Narjatamanins A and B, a pair of novel epimers possessing a 2,3-*seco*-iridoid skeleton with an unusual 1,10-oxygen bridge from *Nardostachys jatamansi* and evaluation of their effects on worm paralysis in *AD C. elegans***

Ye Zhao,<sup>a</sup> Bing Li,<sup>a</sup> Yi-Fan Yu,<sup>a</sup> Pei-Qian Wu,<sup>a</sup> Chun-Xue Yu,<sup>a</sup> Pan-Jie Su,<sup>a</sup> De-Juan Zhi,<sup>a</sup> Feng-Ming Qi,<sup>b</sup> Dong-Qing Fei<sup>\*a</sup> and Zhan-Xin Zhang<sup>\*a</sup>

<sup>a</sup> School of Pharmacy, Lanzhou University, Lanzhou 730000, People's Republic of China.

<sup>b</sup> State Key Laboratory of Applied Organic Chemistry, Lanzhou University, Lanzhou 730000, People's Republic of China

\* Corresponding authors.

E-mail address: E-mail: feidq@lzu.edu.cn (D.Q. Fei); zhangzhx@lzu.edu.cn (Z.X. Zhang)

## TABLE OF CONTENTS

|                                                                                                                      |     |
|----------------------------------------------------------------------------------------------------------------------|-----|
| <b>Figure S1.</b> $^1\text{H}$ NMR spectrum (600 MHz) of narjatamanin A ( <b>1</b> ) in $\text{CDCl}_3$ .....        | S3  |
| <b>Figure S2.</b> $^{13}\text{C}$ NMR spectrum (150 MHz) of narjatamanin A ( <b>1</b> ) in $\text{CDCl}_3$ .....     | S4  |
| <b>Figure S3.</b> HSQC spectrum of narjatamanin A ( <b>1</b> ) in $\text{CDCl}_3$ .....                              | S5  |
| <b>Figure S4.</b> HMBC spectrum of narjatamanin A ( <b>1</b> ) in $\text{CDCl}_3$ .....                              | S6  |
| <b>Figure S5.</b> $^1\text{H}$ - $^1\text{H}$ COSY spectrum of narjatamanin A ( <b>1</b> ) in $\text{CDCl}_3$ .....  | S7  |
| <b>Figure S6.</b> NOESY spectrum of narjatamanin A ( <b>1</b> ) in $\text{CDCl}_3$ .....                             | S8  |
| <b>Figure S7.</b> HRESIMS spectrum of narjatamanin A ( <b>1</b> ).....                                               | S9  |
| <b>Figure S8.</b> IR spectrum of narjatamanin A ( <b>1</b> ).....                                                    | S10 |
| <b>Figure S9.</b> $^1\text{H}$ NMR spectrum (600 MHz) of narjatamanin B ( <b>2</b> ) in $\text{CDCl}_3$ .....        | S11 |
| <b>Figure S10.</b> $^{13}\text{C}$ NMR spectrum (150 MHz) of narjatamanin B ( <b>2</b> ) in $\text{CDCl}_3$ .....    | S12 |
| <b>Figure S11.</b> HSQC spectrum of narjatamanin B ( <b>2</b> ) in $\text{CDCl}_3$ .....                             | S13 |
| <b>Figure S12.</b> HMBC spectrum of narjatamanin B ( <b>2</b> ) in $\text{CDCl}_3$ .....                             | S14 |
| <b>Figure S13.</b> $^1\text{H}$ - $^1\text{H}$ COSY spectrum of narjatamanin B ( <b>2</b> ) in $\text{CDCl}_3$ ..... | S15 |
| <b>Figure S14.</b> NOESY spectrum of narjatamanin B ( <b>2</b> ) in $\text{CDCl}_3$ .....                            | S16 |
| <b>Figure S15.</b> HRESIMS spectrum of narjatamanin B ( <b>2</b> ).....                                              | S17 |
| <b>Figure S16.</b> IR spectrum of narjatamanin B ( <b>2</b> ) .....                                                  | S18 |

Figure S1. <sup>1</sup>H NMR spectrum (600 MHz) of narjatamanin A (**1**) in CDCl<sub>3</sub>

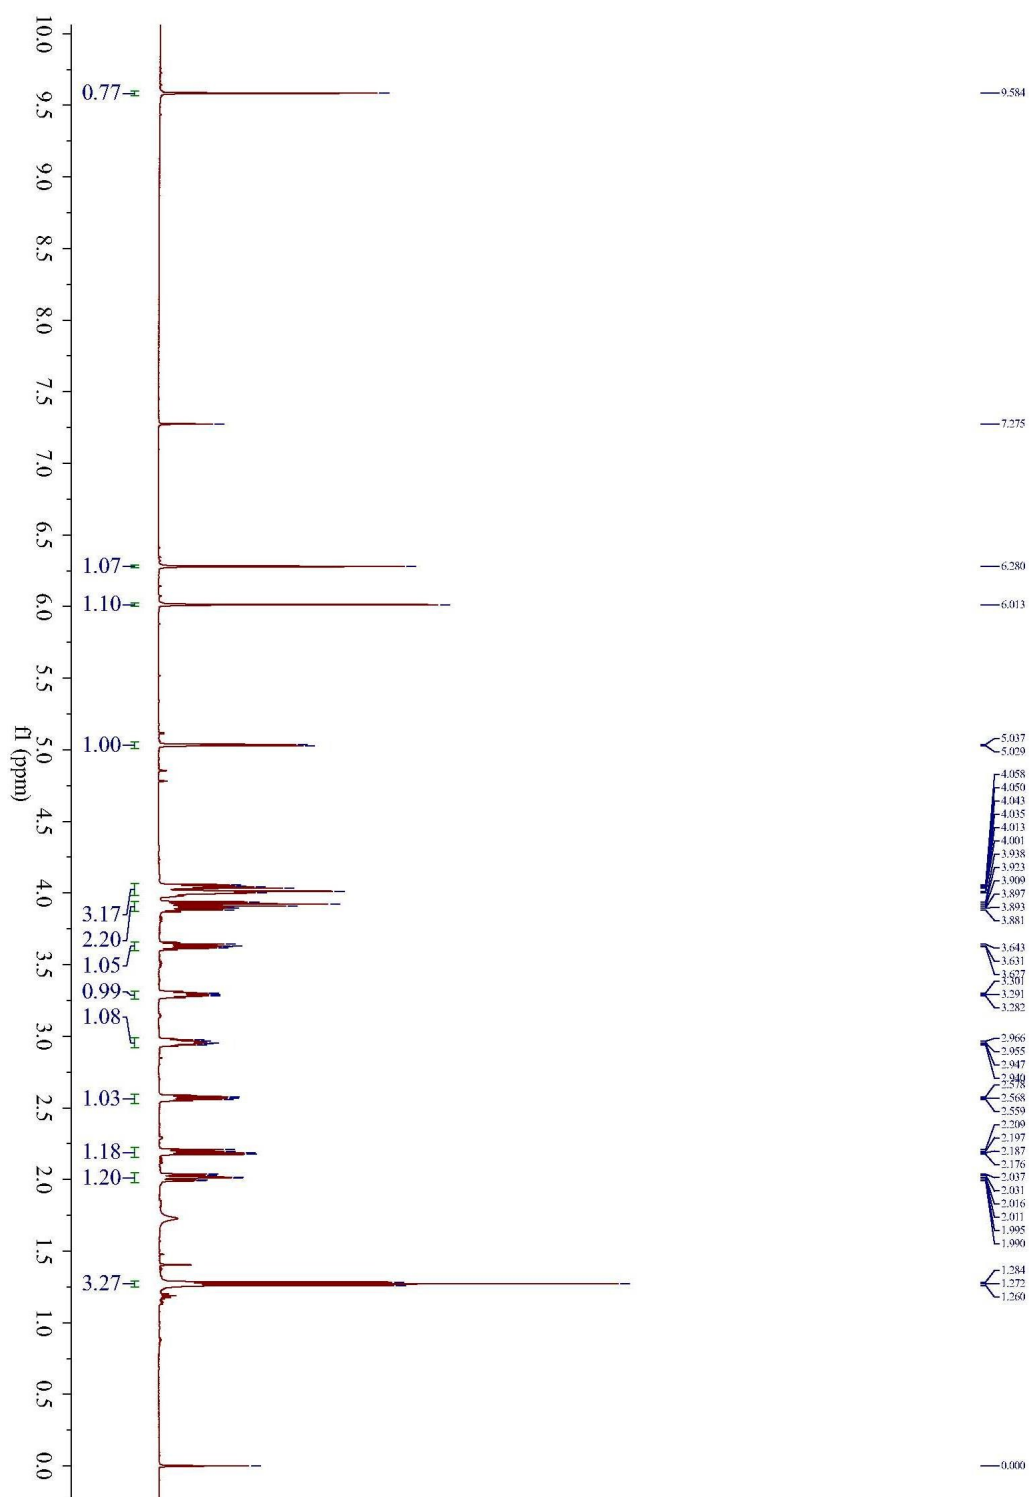

Figure S2.  $^{13}\text{C}$  NMR spectrum (150 MHz) of narjatamanin A (**1**) in  $\text{CDCl}_3$

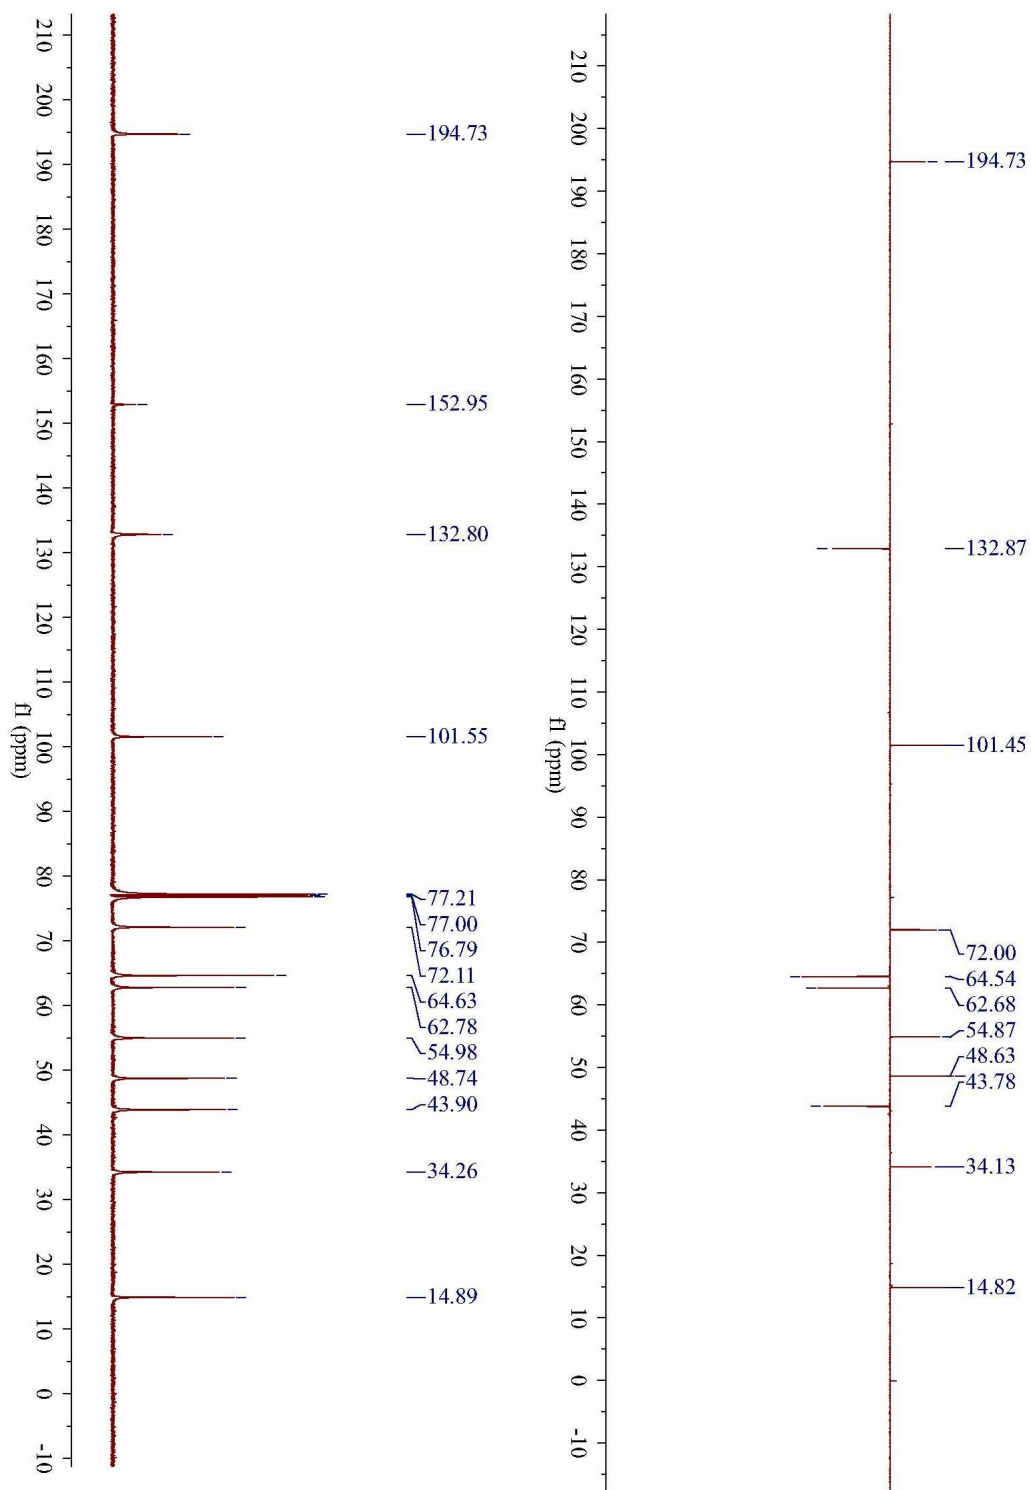

**Figure S3.** HSQC spectrum of narjatamanin A (**1**) in CDCl<sub>3</sub>

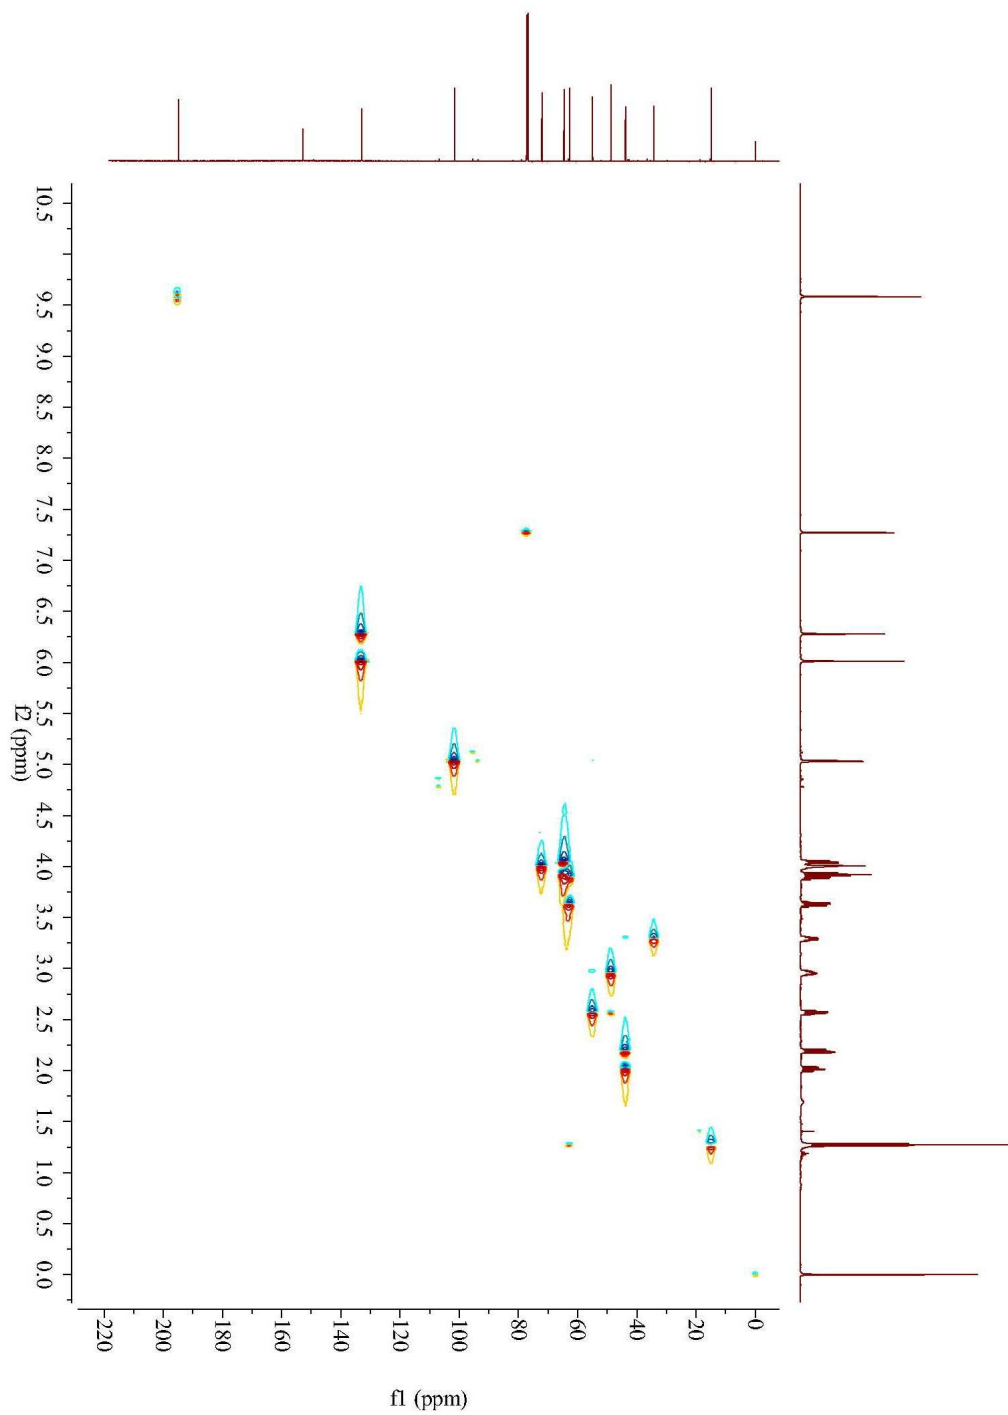

Figure S4. HMBC spectrum of narjatamanin A (**1**) in CDCl<sub>3</sub>

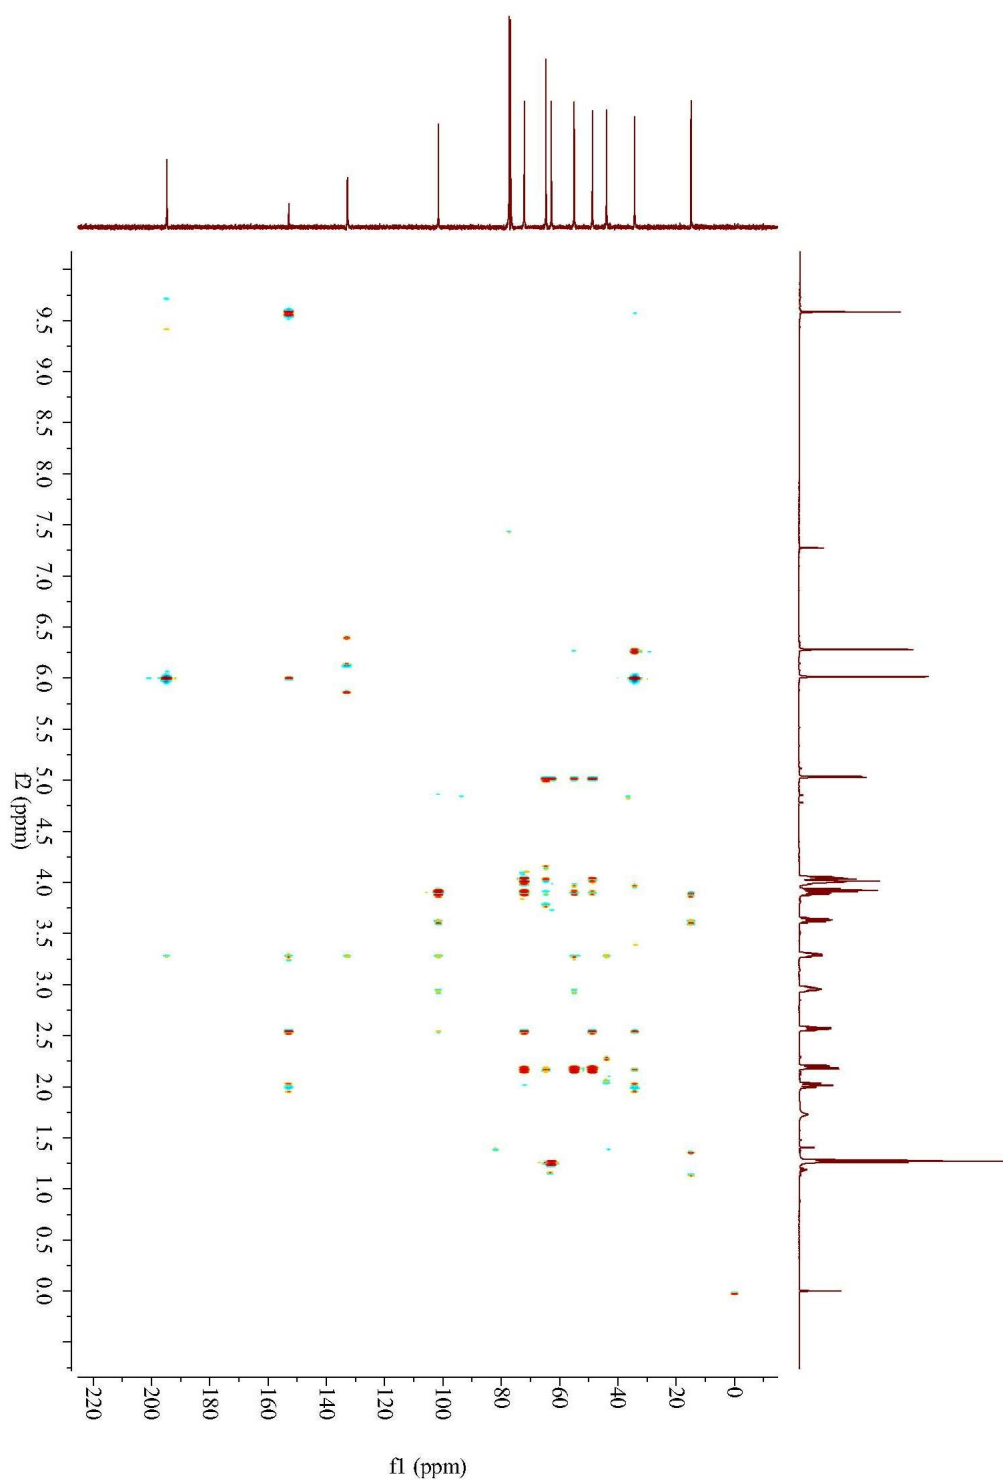

Figure S5.  $^1\text{H}$ - $^1\text{H}$  COSY spectrum of narjatamanin A (**1**) in  $\text{CDCl}_3$

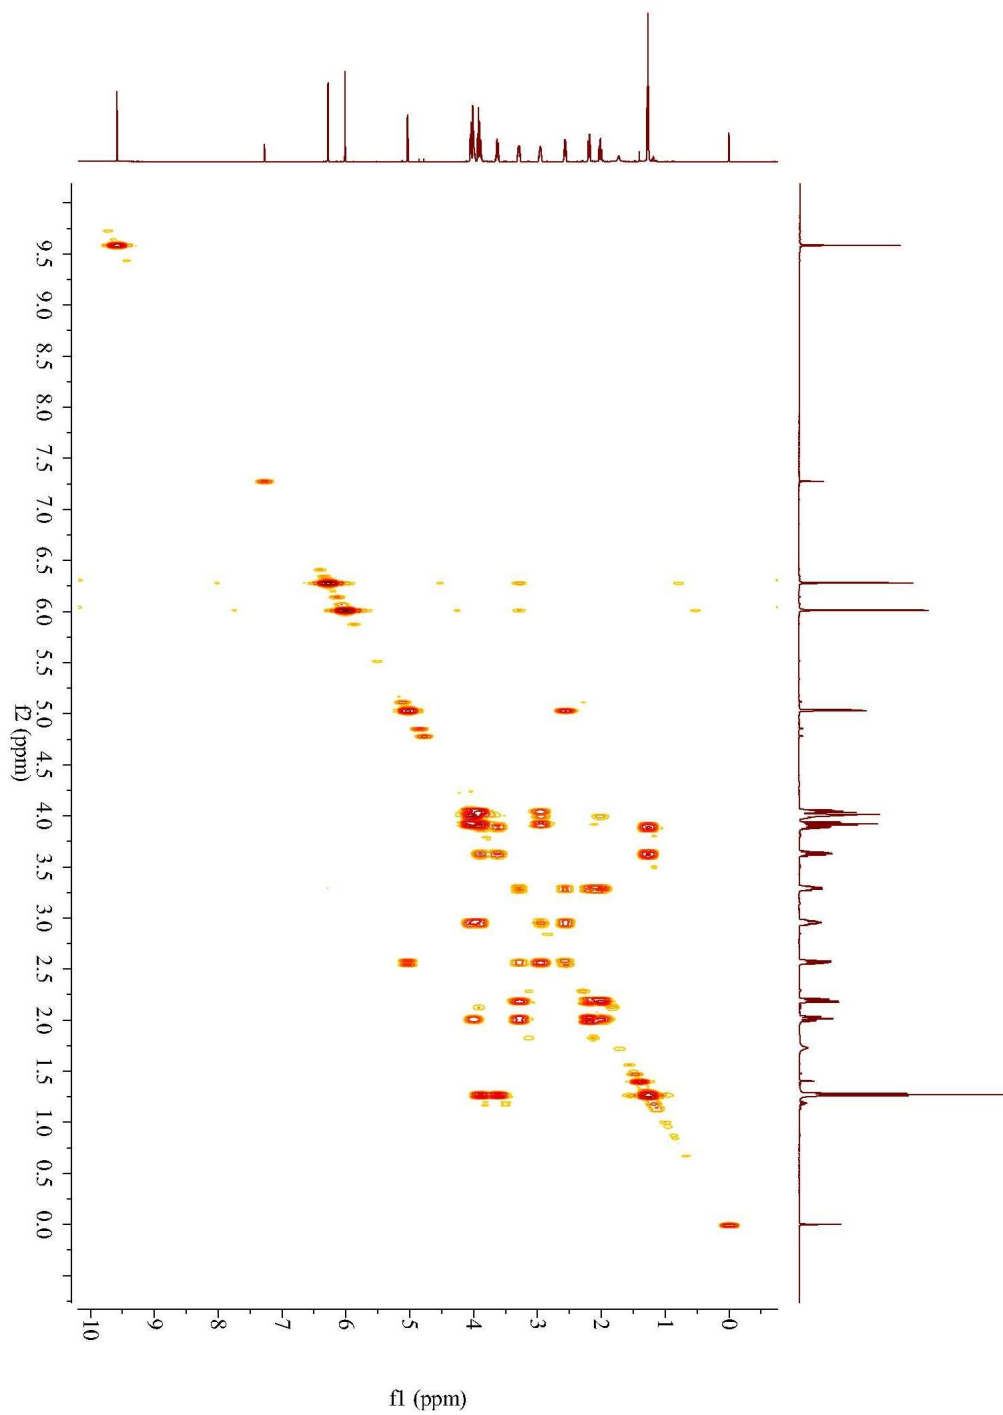

**Figure S6.** NOESY spectrum of narjatamanin A (**1**) in CDCl<sub>3</sub>

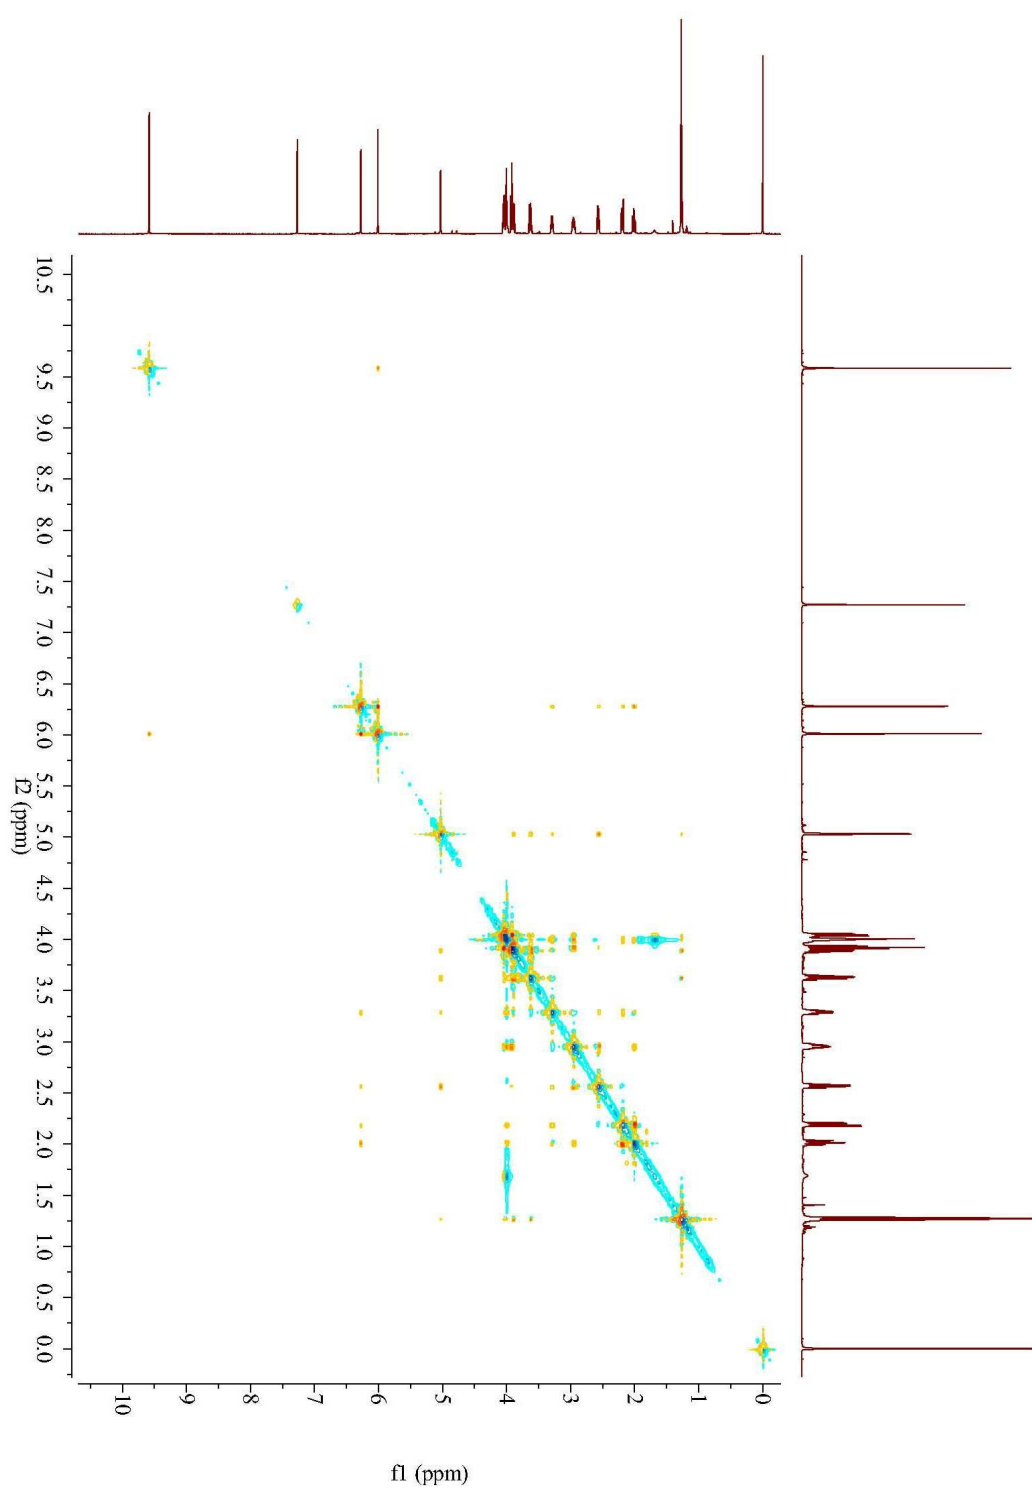



Figure S7. HRESIMS spectrum of narjatamanin A (1)

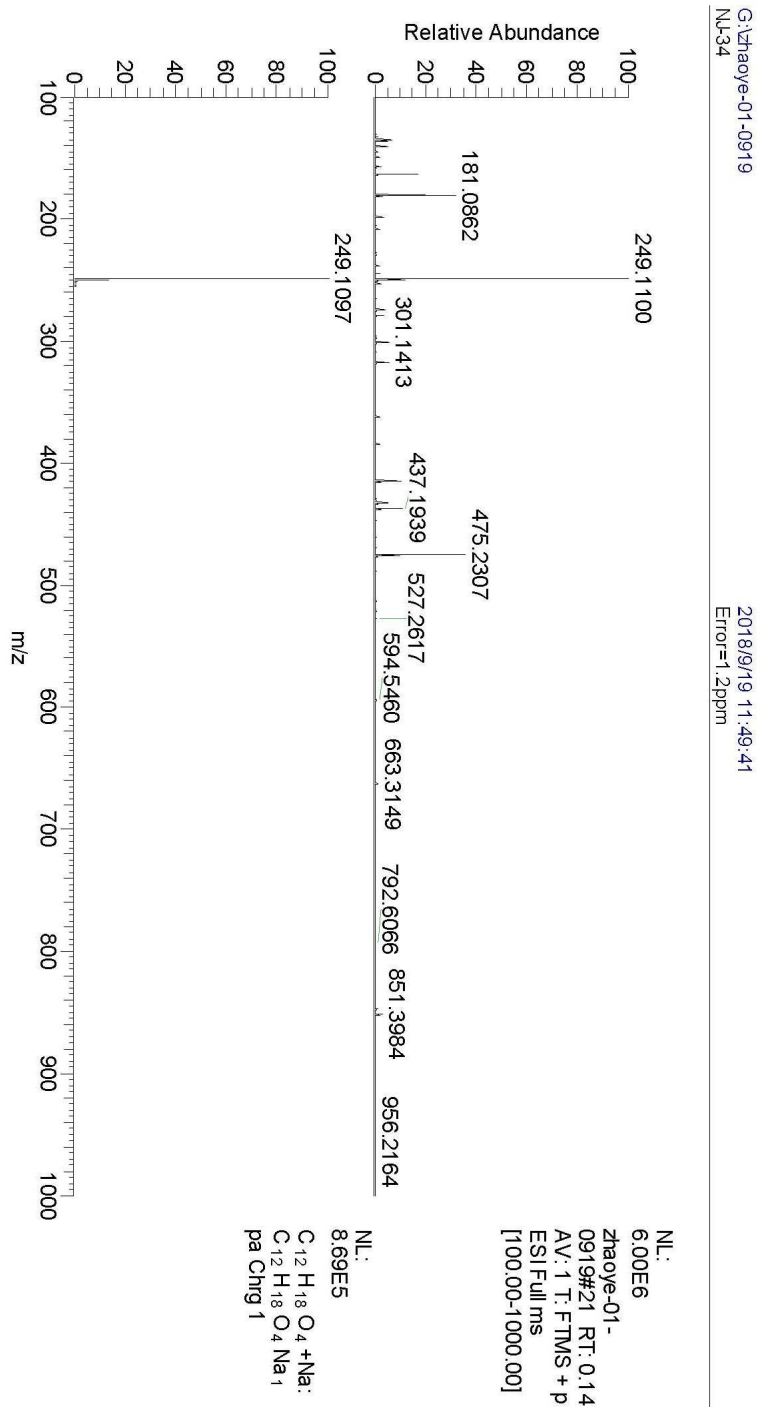

Figure S8. IR spectrum of narjatamanin A (1)

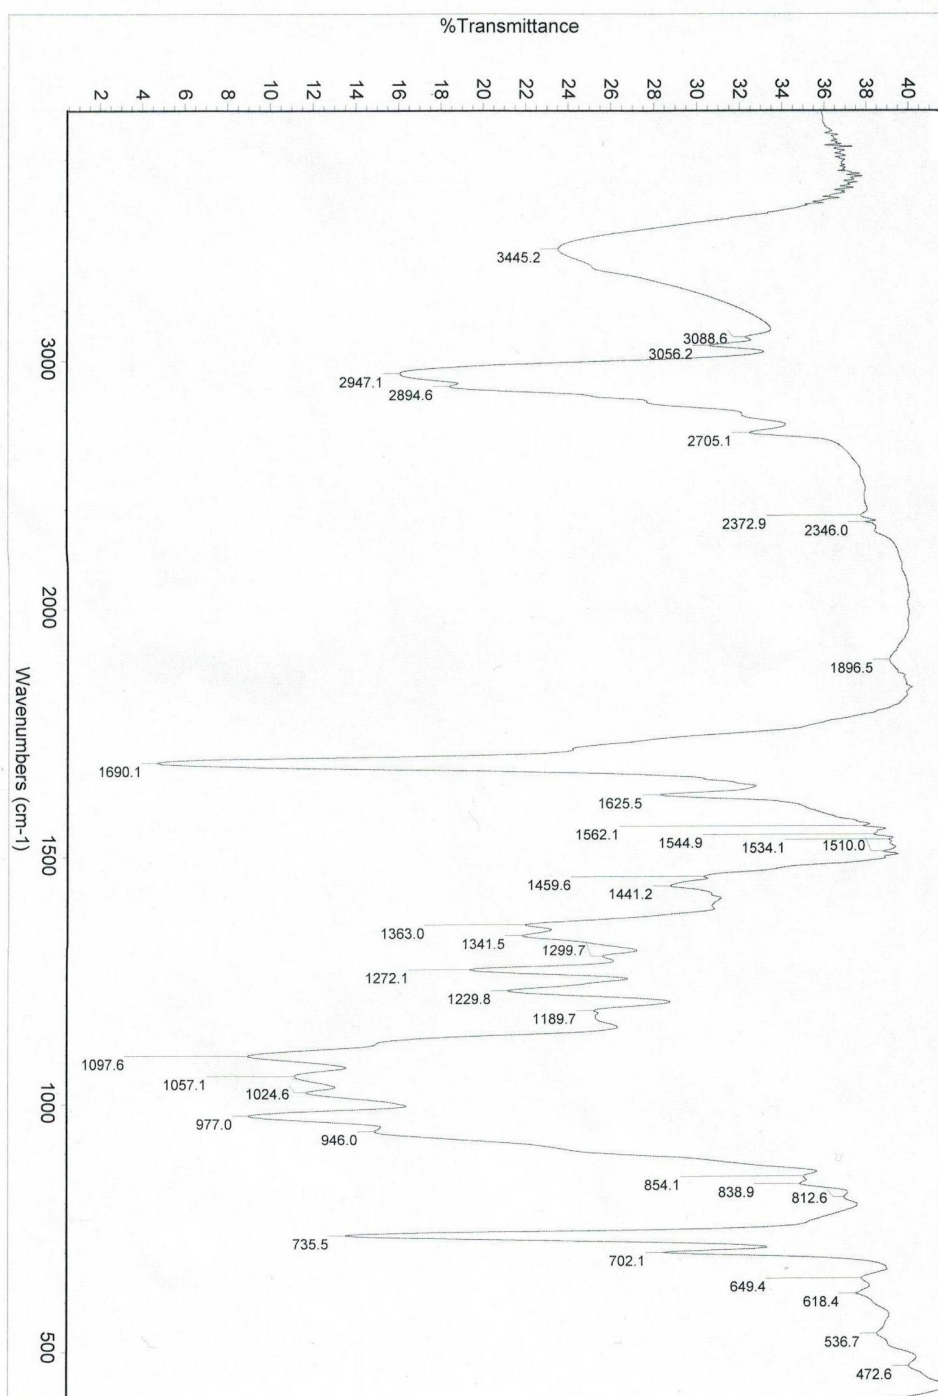

Figure S9.  $^1\text{H}$  NMR spectrum (600 MHz) of narjatamanin B (**2**) in  $\text{CDCl}_3$

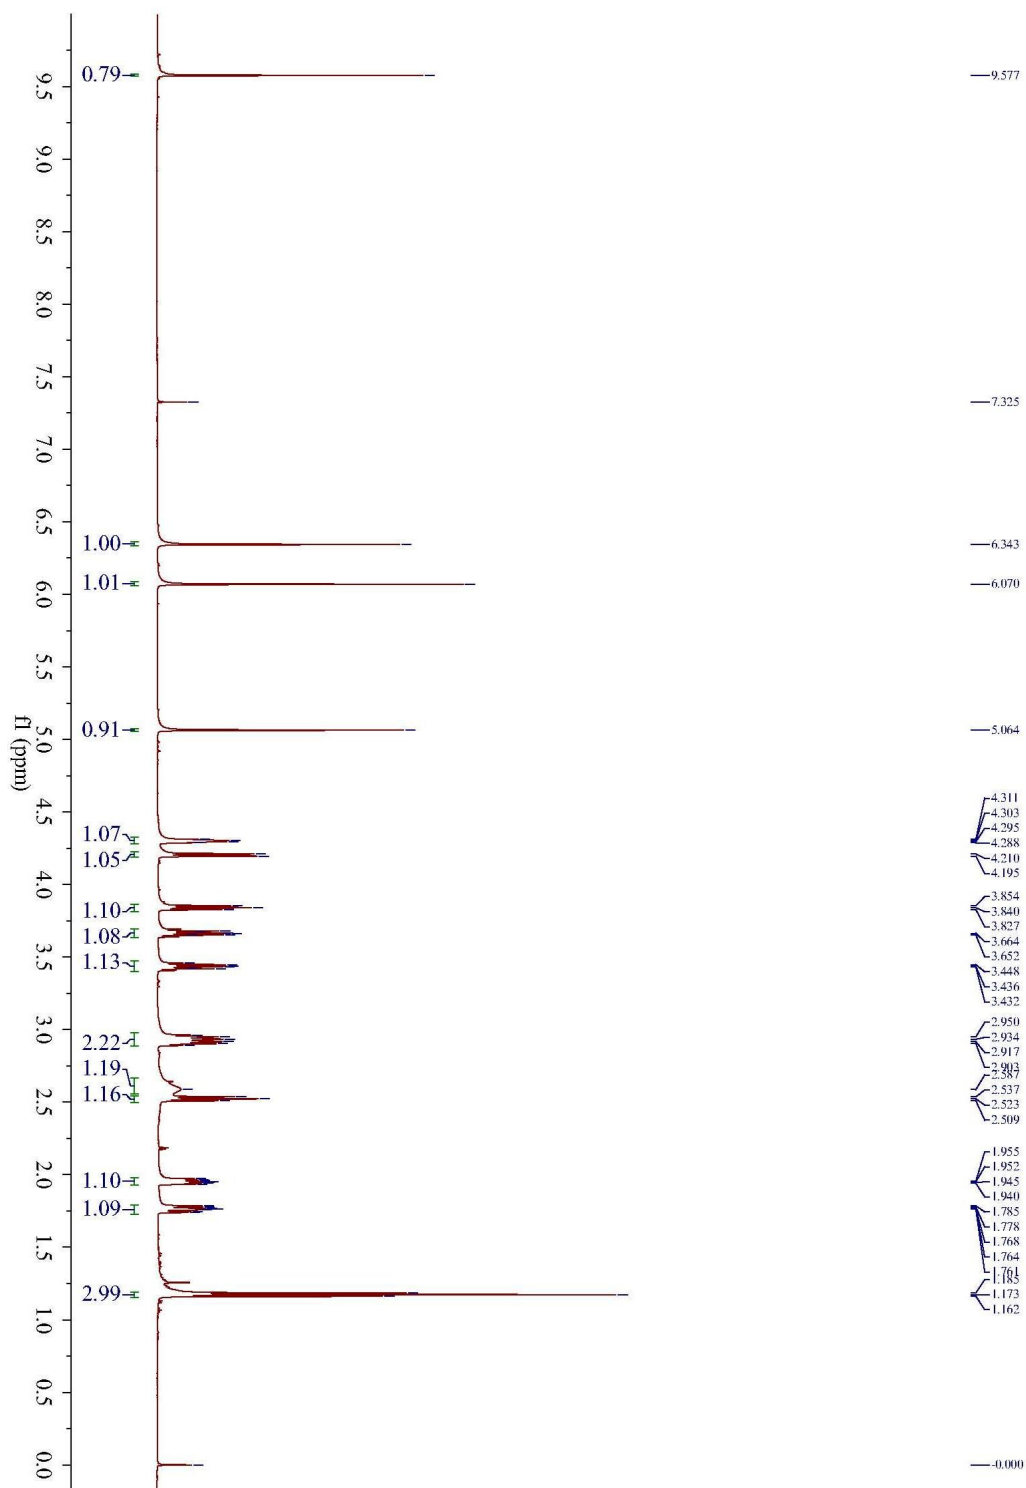

Figure S10.  $^{13}\text{C}$  NMR spectrum (150 MHz) of narjatamanin B (**2**) in  $\text{CDCl}_3$

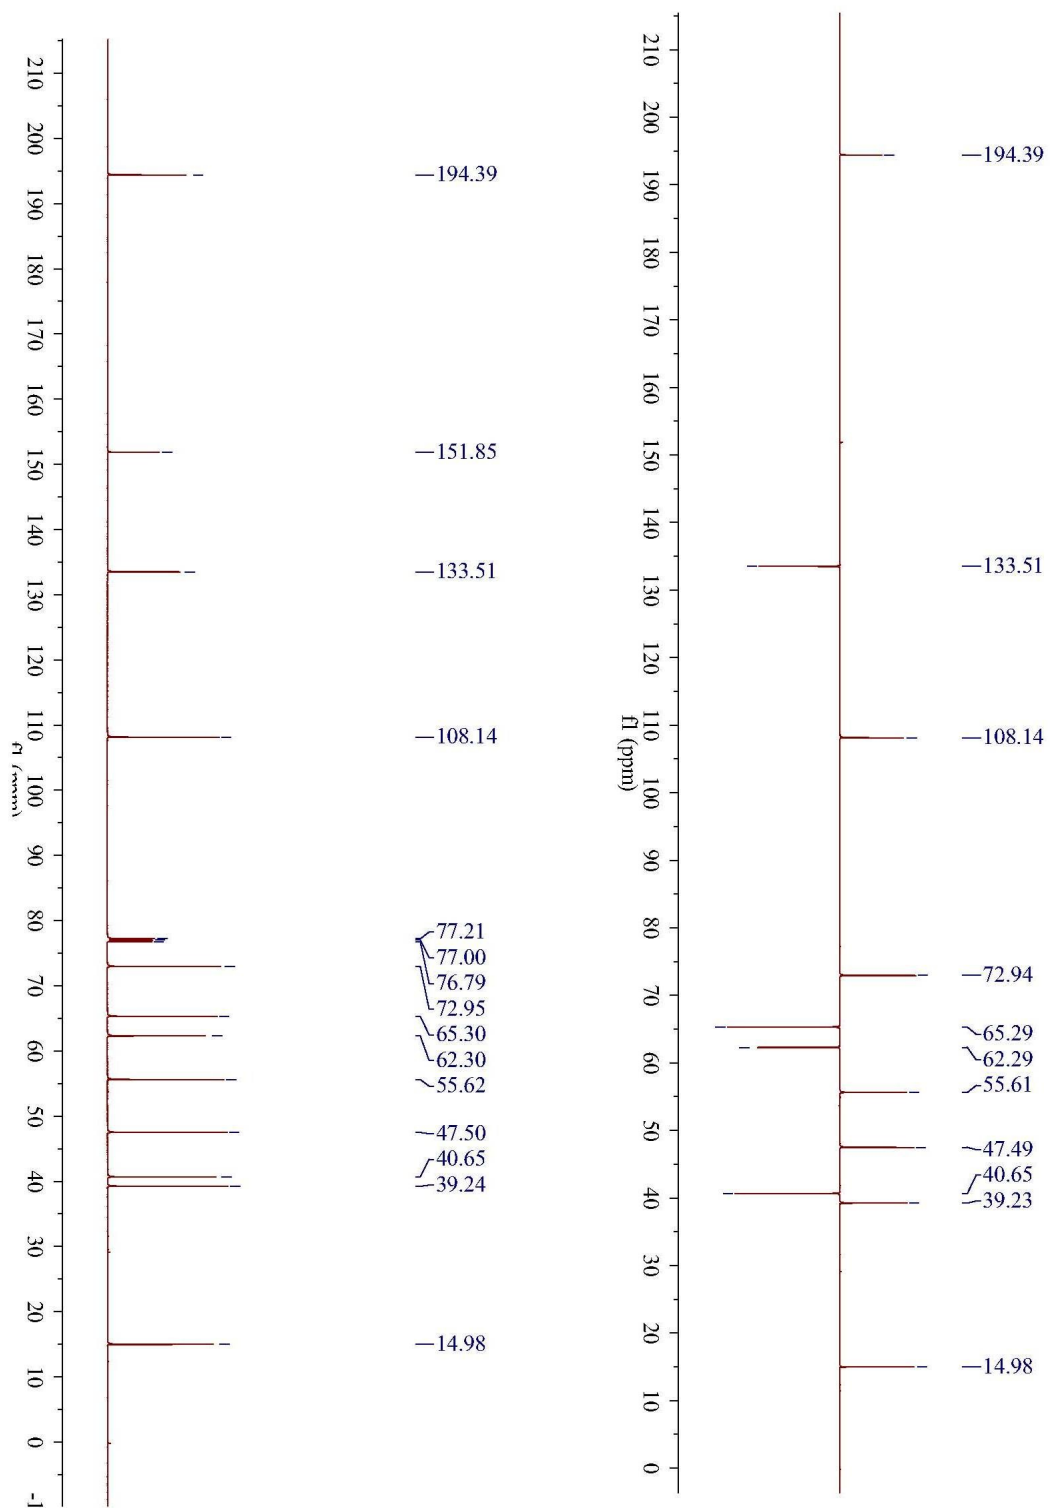

Figure S11. HSQC spectrum of narjatamanin B (2) in CDCl<sub>3</sub>

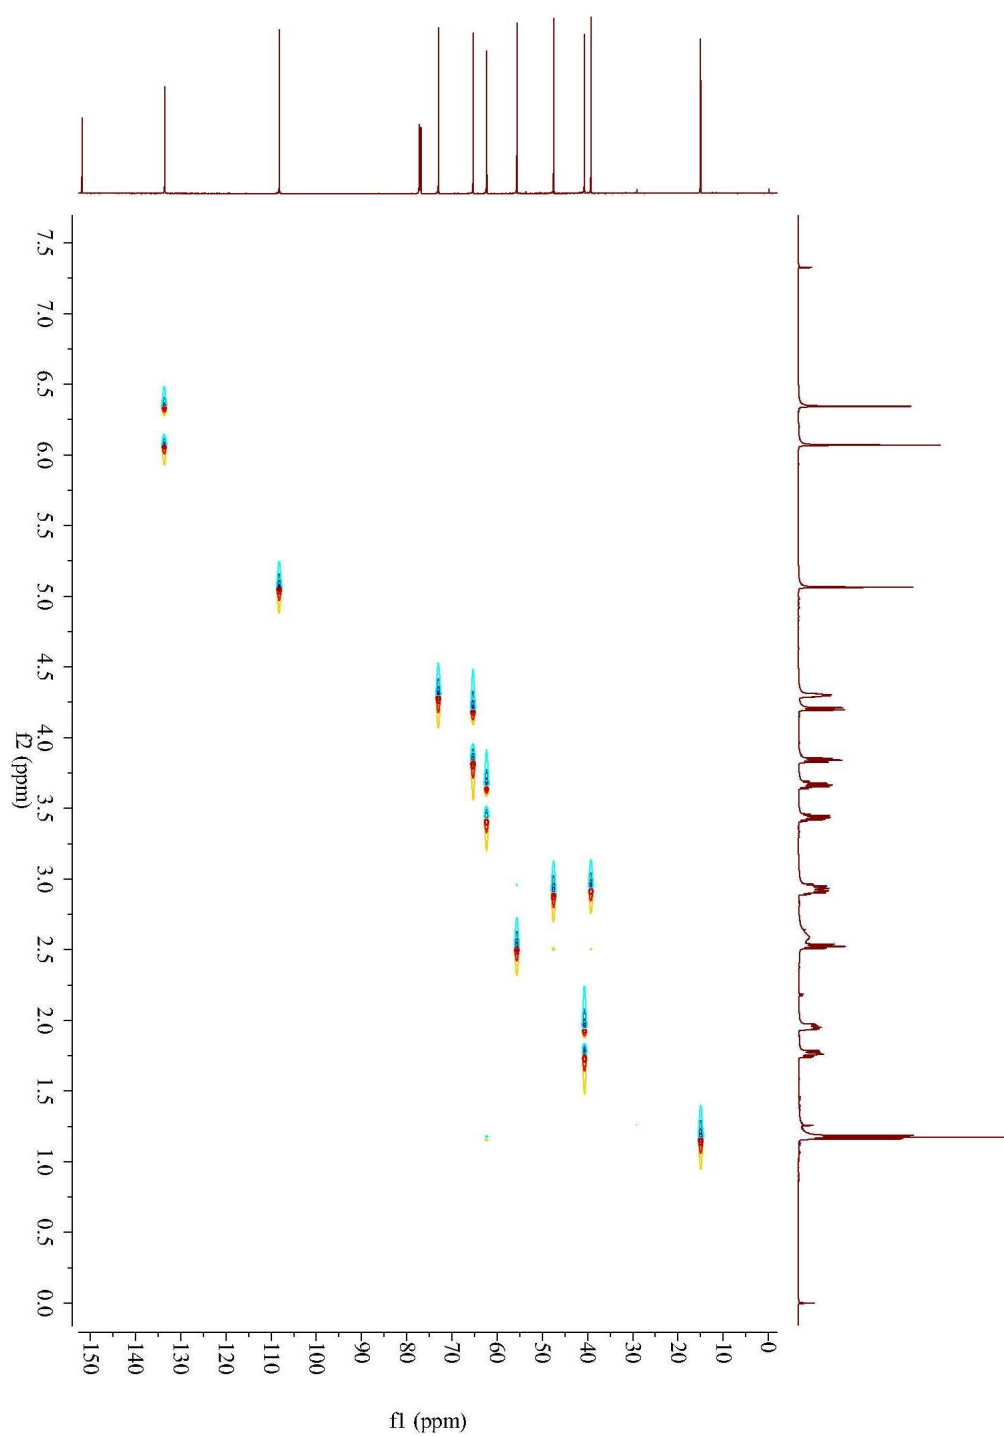

Figure S12. HMBC spectrum of narjatamanin B (2) in CDCl<sub>3</sub>

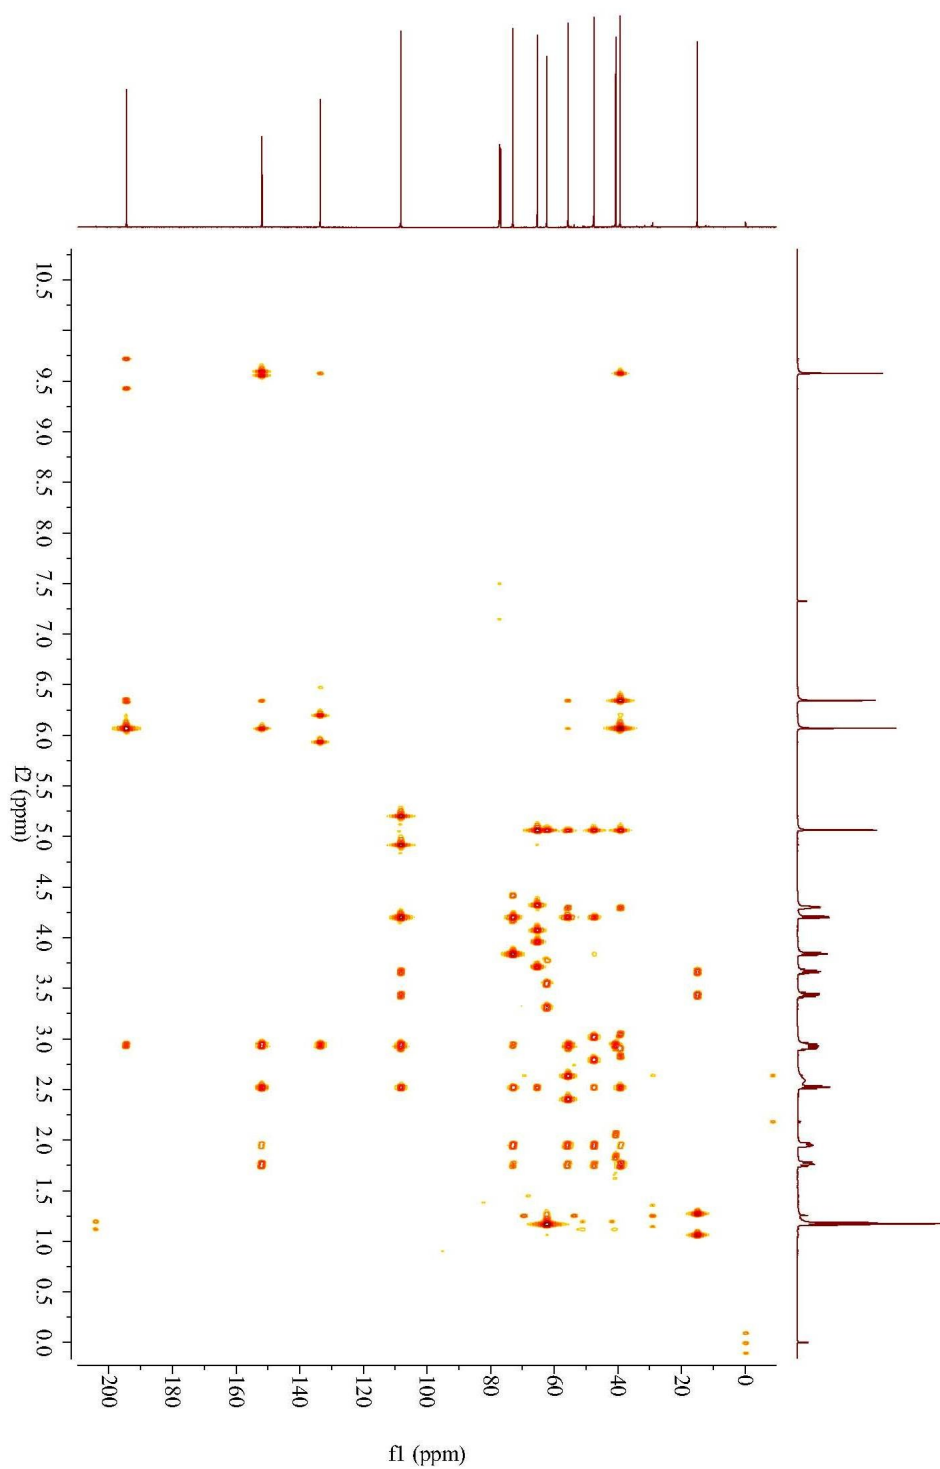

Figure S13.  $^1\text{H}$ - $^1\text{H}$  COSY spectrum of narjatamanin B (**2**) in  $\text{CDCl}_3$

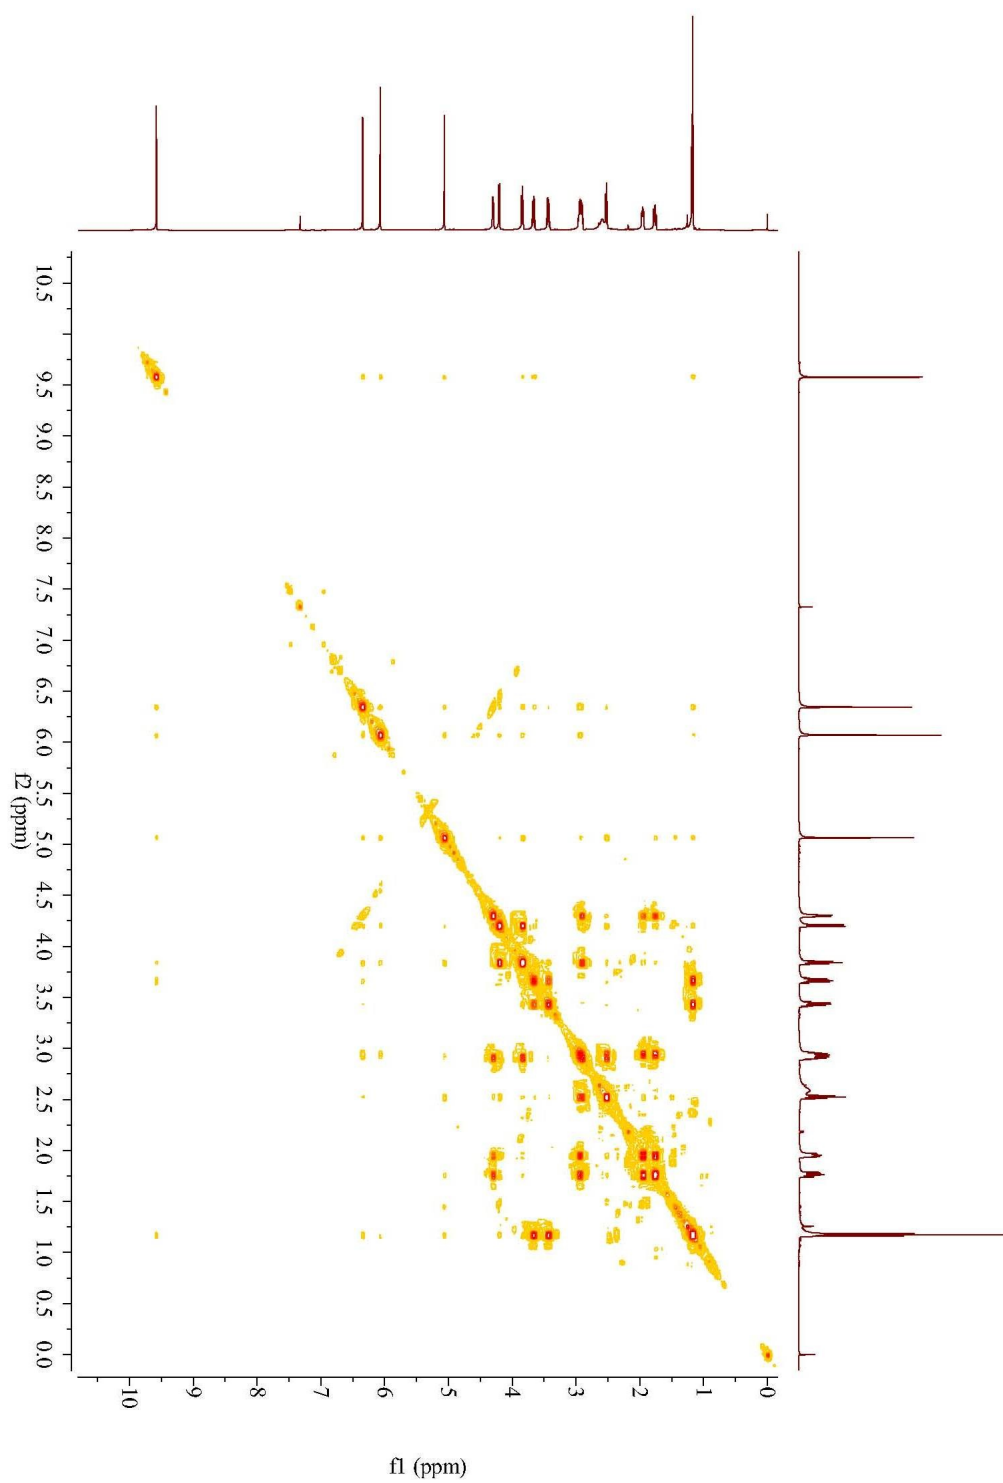

Figure S14. NOESY spectrum of narjatamanin B (2) in CDCl<sub>3</sub>

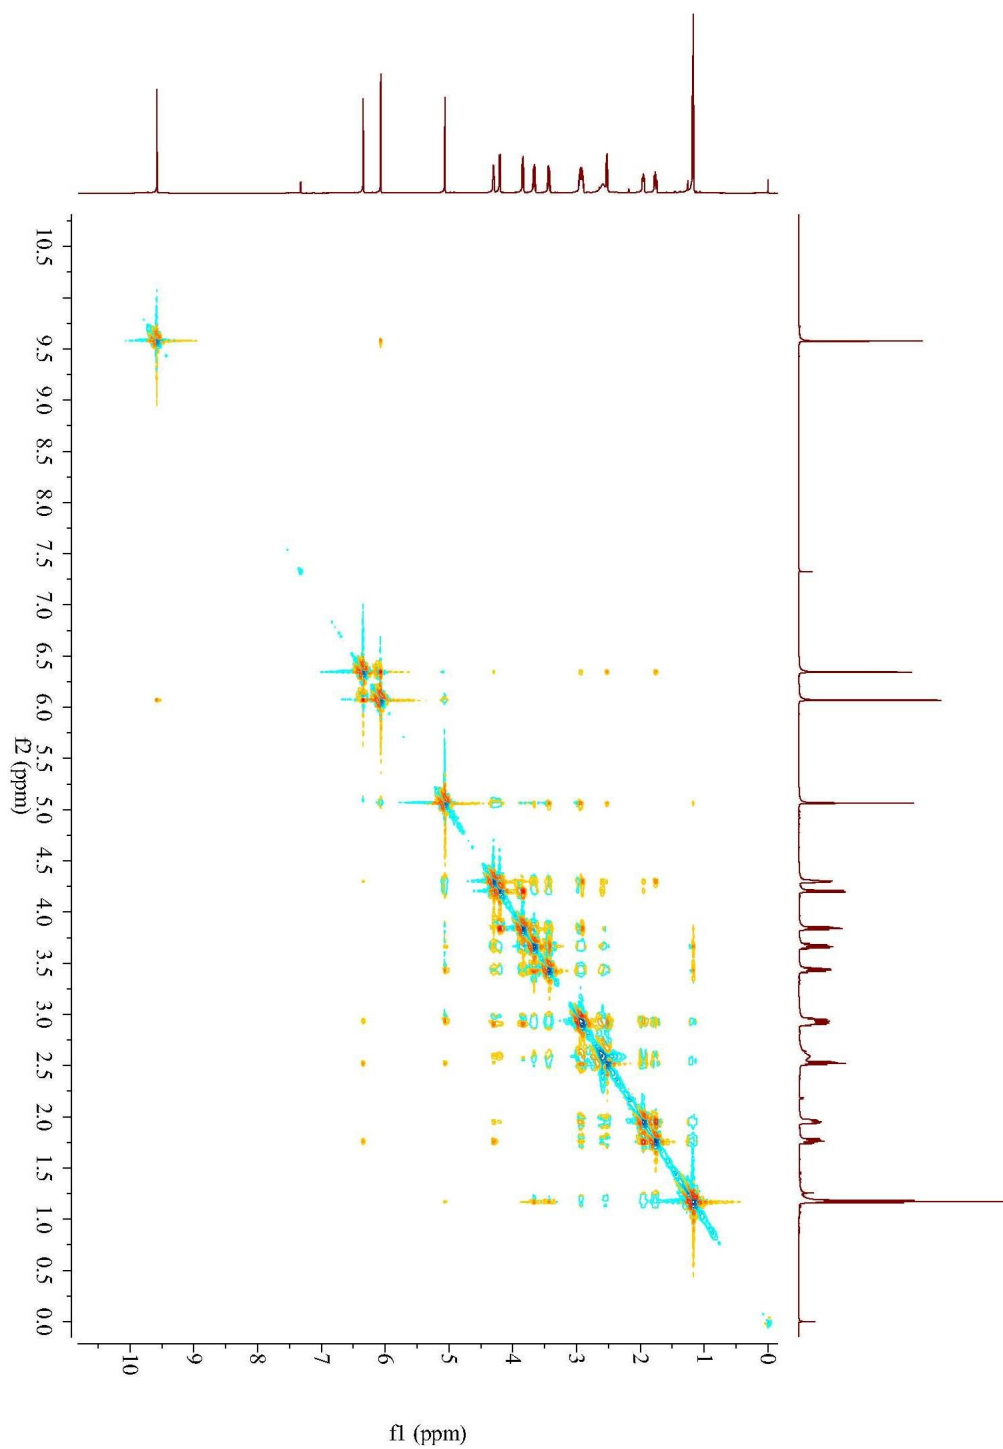



Figure S15. HRESIMS spectrum of narjatamanin B (2)

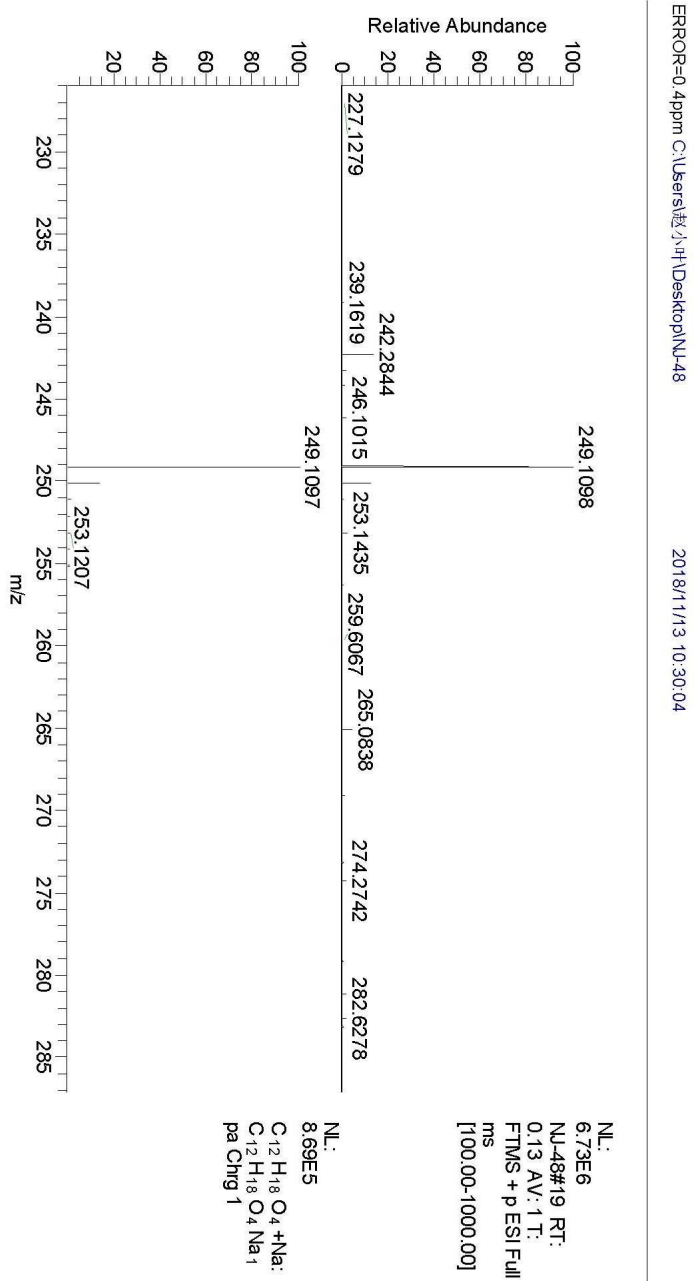

Figure S16. IR spectrum of narjatamanin B (2)

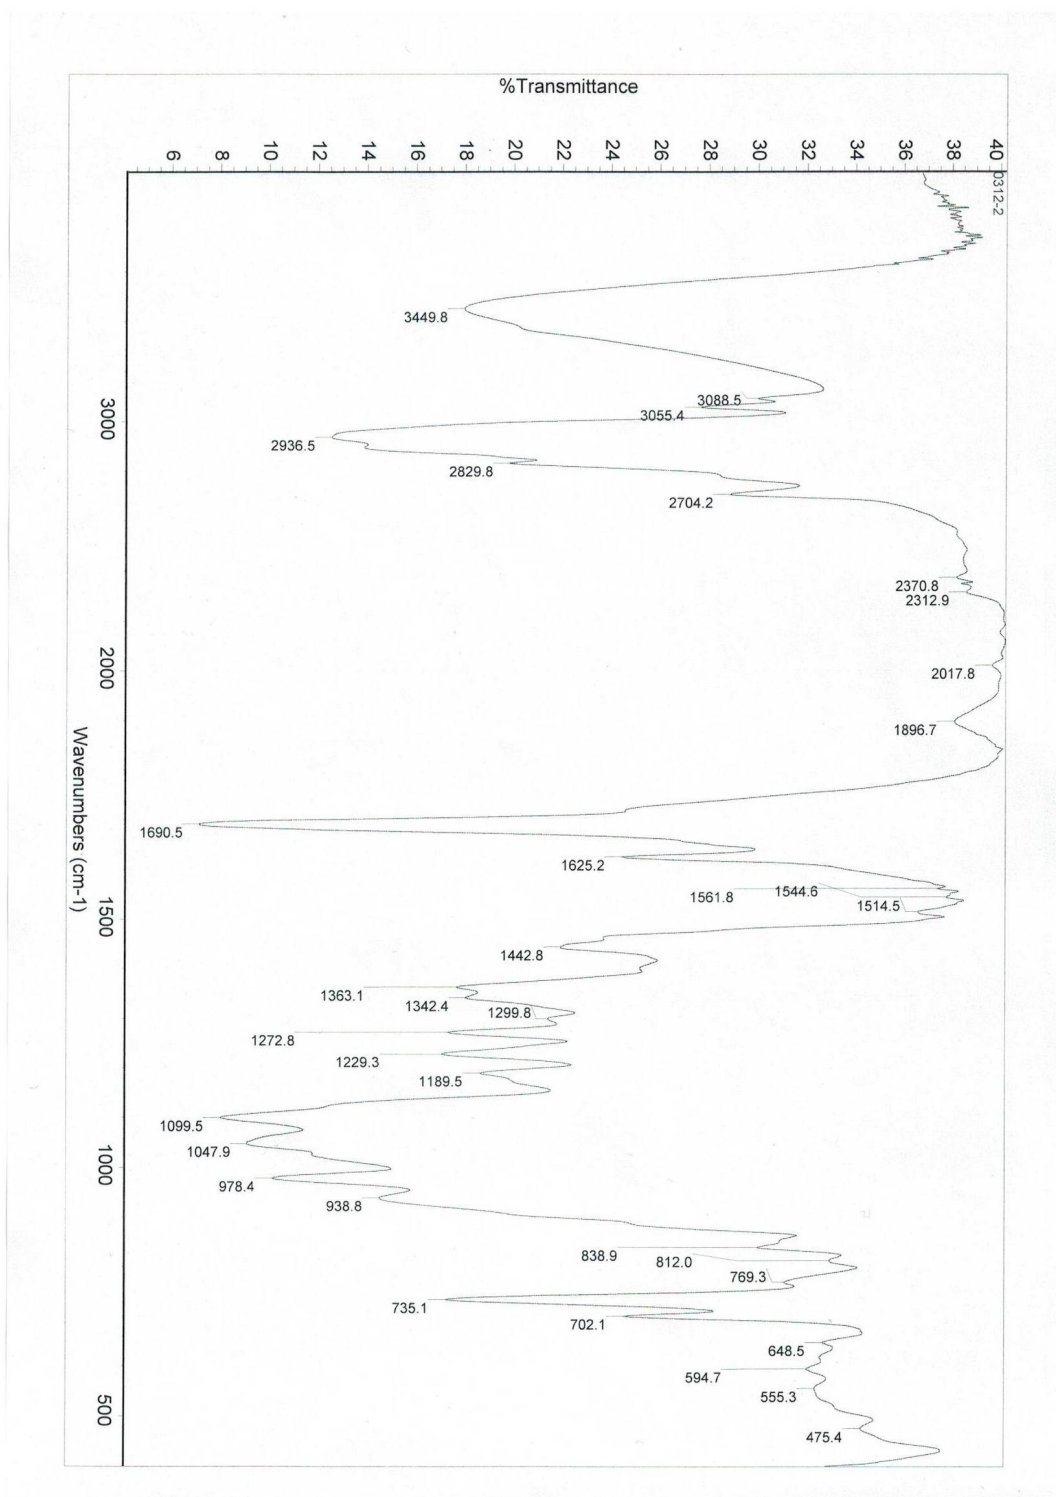

Supplement: c9ra04485j1.pdf [file c9ra04485j1.pdf]
